## Index of Authors and Titles

- BELLAIRS, R. *and* VEINI, M. Experimental analysis of control mechanisms in somite segmentation in avian embryos. II. Reduction of material in the gastrula stages of the chick 183
- BOLTON, V. N., OADES, P. J. *and* JOHNSON, M. H. The relationship between cleavage, DNA replication and gene expression in the mouse 2-cell embryo 139
- CHENEY, C. M. *and* LASH, J. W. An increase in cell-cell adhesion in the chick segmental plate results in a meristic pattern 1
- CONTI DEVIRGILIIS, L., DINI, L. *and* RUSSO-CAIA, S. Electron microscopic evidence for the presence of an asialoglycoprotein receptor on isolated foetal rat hepatocyte surface 41
- CZOŁOWSKA, R. *See* WAKSMUNDZKA, M.
- DINI, L. *See* CONTI DEVIRGILIIS, L.
- FERNANDEZ, M. A. *See* HURLE, J. M.
- GLADE, R. *See* HOLDER, N.
- GOODALL, H. *and* JOHNSON, M. H. The nature of intercellular coupling within the preimplantation mouse embryo 53
- HALL, B. K. *See* VAN EXAN, R. J.
- HOLDER, N. *and* GLADE, R. Skin glands in the axolotl: the creation and maintenance of a spacing pattern 97
- HOLDER, N. *and* REYNOLDS, S. Morphogenesis of the amphibian limb blastema: the relationship between pattern and form 165
- HURLE, J. M. *and* FERNANDEZ-TERAN, M. A. Fine structure of the interdigital membranes during the morphogenesis of the digits of the webbed foot of the duck embryo 201
- JAHODA, C. A. B. *and* OLIVER, R. F. Vibrissa dermal papilla cell aggregative behaviour *in vivo* and *in vitro* 211
- JOHNSON, M. H. *See* GOODALL, H.
- JOHNSON, M. H. *See* BOLTON, V. N.
- KARASIEWICZ, J. *See* WAKSMUNDZKA, M.
- KLUDKIEWICZ, B. *See* OLSZAŃSKA, B.
- KRYSIK, E. *See* WAKSMUNDZKA, M.
- KUWADA, J. Y. Normal and abnormal development of an identified leech motor neuron 125
- LASH, J. W. *See* CHENEY, C. M.
- LASSOTA, Z. *See* OLSZAŃSKA, B.
- OADES, P. J. *See* BOLTON, V. N.
- OLIVER, R. F. *See* JAHODA, C. A. B.
- OLSZAŃSKA, B., KLUDKIEWICZ, B. *and* LASSOTA, Z. Transcription and polyadenylation processes during early development of quail embryo 11
- REYNOLDS, S. *See* HOLDER, N.
- RUSSO-CAIA, S. *See* CONTI DEVIRGILIIS, L.
- SANDERS, E. J. Labelling of basement membrane constituents in the living chick embryo during gastrulation 113

- SHIOJIRI, N. The origin of intrahepatic bile duct cells in the mouse 25
- SOLURSH, M. S. *See* SWALLA, B. J.
- SWALLA, B. J. *and* SOLURSH, M. S. Epithelial enhancement of connective tissue differentiation in explanted somites 243
- TARKOWSKI, A. K. *See* WAKSMUNDZKA, M.
- VAN EXAN, R. J. *and* HALL, B. K. Epithelial induction of osteogenesis in embryonic chick mandibular mesenchyme studied by transfilter tissue recombinations 225
- VEINI, M. *See* BELLAIRS, R.
- WAKSMUNDZKA, M., KRYSIAK, E., KARASIEWICZ, J., CZOŁOWSKA, R. *and* TARKOWSKI, A. K. Autonomous cortical activity in mouse eggs controlled by a cytoplasmic clock 77
